# Supplementary material for: IL-23 signaling is not an important driver of liver inflammation and fibrosis in murine non-alcoholic steatohepatitis models
Source: PubMed Central journal article supplement (PMC9477333; doi:10.1371/journal.pone.0274582), 2022-09-15

# PLOS ONE

## IL23 signaling is not an important driver of liver inflammation and fibrosis in murine non-alcoholic steatohepatitis models

--Manuscript Draft--

|                                             |                                                                                                                                                                                                                                                                                                                                                                                                                                                                                                                                                                                                                                                                                                                                                                                                                                                                                                                                                                                                                                                                                                                                                                                                                                                                                                                                                                                                                                                                                  |
|---------------------------------------------|----------------------------------------------------------------------------------------------------------------------------------------------------------------------------------------------------------------------------------------------------------------------------------------------------------------------------------------------------------------------------------------------------------------------------------------------------------------------------------------------------------------------------------------------------------------------------------------------------------------------------------------------------------------------------------------------------------------------------------------------------------------------------------------------------------------------------------------------------------------------------------------------------------------------------------------------------------------------------------------------------------------------------------------------------------------------------------------------------------------------------------------------------------------------------------------------------------------------------------------------------------------------------------------------------------------------------------------------------------------------------------------------------------------------------------------------------------------------------------|
| <b>Manuscript Number:</b>                   | PONE-D-22-09562                                                                                                                                                                                                                                                                                                                                                                                                                                                                                                                                                                                                                                                                                                                                                                                                                                                                                                                                                                                                                                                                                                                                                                                                                                                                                                                                                                                                                                                                  |
| <b>Article Type:</b>                        | Research Article                                                                                                                                                                                                                                                                                                                                                                                                                                                                                                                                                                                                                                                                                                                                                                                                                                                                                                                                                                                                                                                                                                                                                                                                                                                                                                                                                                                                                                                                 |
| <b>Full Title:</b>                          | IL23 signaling is not an important driver of liver inflammation and fibrosis in murine non-alcoholic steatohepatitis models                                                                                                                                                                                                                                                                                                                                                                                                                                                                                                                                                                                                                                                                                                                                                                                                                                                                                                                                                                                                                                                                                                                                                                                                                                                                                                                                                      |
| <b>Short Title:</b>                         | IL23 is not required for NASH                                                                                                                                                                                                                                                                                                                                                                                                                                                                                                                                                                                                                                                                                                                                                                                                                                                                                                                                                                                                                                                                                                                                                                                                                                                                                                                                                                                                                                                    |
| <b>Corresponding Author:</b>                | Ning Ding<br>Genentech USA Inc South San Francisco<br>South San Francisco, California UNITED STATES                                                                                                                                                                                                                                                                                                                                                                                                                                                                                                                                                                                                                                                                                                                                                                                                                                                                                                                                                                                                                                                                                                                                                                                                                                                                                                                                                                              |
| <b>Keywords:</b>                            |                                                                                                                                                                                                                                                                                                                                                                                                                                                                                                                                                                                                                                                                                                                                                                                                                                                                                                                                                                                                                                                                                                                                                                                                                                                                                                                                                                                                                                                                                  |
| <b>Abstract:</b>                            | <p>Non-alcoholic fatty liver disease (NAFLD), represents an unmet medical need that can progress to non-alcoholic steatohepatitis (NASH), which, without intervention, can result in the development of cirrhosis and hepatocellular carcinoma (HCC). Inflammation is a pathological hallmark of NASH, and targeting key inflammatory mediators of NASH may lead to potential therapeutics for the disease. Herein, we aimed to investigate the role of IL-23 signaling in the disease progression in murine NASH models. We showed that recombinant IL-23 can promote IL-17 producing cell expansion in the liver and that these cells are predominately T cells and Mucosal Associated Invariant T cells (MAITs). Reciprocally, we found that IL23R is necessary for the expansion of T cells and MAIT cells in the western diet (WD) diet induced NASH model. However, we did not observe any dramatic differences in liver inflammation and fibrosis between wild type and Il23r<sup>-/-</sup> mice in the same NASH model. Furthermore, we found that Il23r deletion does not impact liver inflammation and fibrosis in the choline-deficient, L-amino acid-defined and high-fat diet (CDA-HFD) induced NASH model. Based on these findings, we therefore propose that IL-23 signaling is not a crucial determinant of NASH pathogenesis in preclinical models and targeting this pathway may not be sufficient to ameliorate the disease progression in NASH patients.</p> |
| <b>Order of Authors:</b>                    | <p>Ning Ding</p> <p>Jose E. Heredia</p> <p>Clare Sorenson</p> <p>Sean Flanagan</p> <p>Victor Nunez</p> <p>Charles Jones</p> <p>Angela Martzall</p> <p>Laurie Leong</p> <p>Andres Martinez-Paler</p> <p>Alexis Scherl</p> <p>Hans D. Brightbill</p> <p>Nico Ghilardi</p>                                                                                                                                                                                                                                                                                                                                                                                                                                                                                                                                                                                                                                                                                                                                                                                                                                                                                                                                                                                                                                                                                                                                                                                                          |
| <b>Additional Information:</b>              |                                                                                                                                                                                                                                                                                                                                                                                                                                                                                                                                                                                                                                                                                                                                                                                                                                                                                                                                                                                                                                                                                                                                                                                                                                                                                                                                                                                                                                                                                  |
| <b>Question</b>                             | <b>Response</b>                                                                                                                                                                                                                                                                                                                                                                                                                                                                                                                                                                                                                                                                                                                                                                                                                                                                                                                                                                                                                                                                                                                                                                                                                                                                                                                                                                                                                                                                  |
| <b>Financial Disclosure</b>                 | The author(s) received no specific funding for this work.                                                                                                                                                                                                                                                                                                                                                                                                                                                                                                                                                                                                                                                                                                                                                                                                                                                                                                                                                                                                                                                                                                                                                                                                                                                                                                                                                                                                                        |
| Enter a financial disclosure statement that |                                                                                                                                                                                                                                                                                                                                                                                                                                                                                                                                                                                                                                                                                                                                                                                                                                                                                                                                                                                                                                                                                                                                                                                                                                                                                                                                                                                                                                                                                  |

describes the sources of funding for the work included in this submission. Review the [submission guidelines](#) for detailed requirements. View published research articles from [PLOS ONE](#) for specific examples.

This statement is required for submission and **will appear in the published article** if the submission is accepted. Please make sure it is accurate.

#### Unfunded studies

Enter: *The author(s) received no specific funding for this work.*

#### Funded studies

Enter a statement with the following details:

- Initials of the authors who received each award
- Grant numbers awarded to each author
- The full name of each funder
- URL of each funder website
- Did the sponsors or funders play any role in the study design, data collection and analysis, decision to publish, or preparation of the manuscript?
- **NO** - Include this sentence at the end of your statement: *The funders had no role in study design, data collection and analysis, decision to publish, or preparation of the manuscript.*
- **YES** - Specify the role(s) played.

\* typeset

#### Competing Interests

Use the instructions below to enter a competing interest statement for this submission. On behalf of all authors, disclose any [competing interests](#) that could be perceived to bias this work—acknowledging all financial support and any other relevant financial or non-financial competing interests.

This statement is **required** for submission and **will appear in the published article** if the submission is accepted. Please make sure it is accurate and that any funding

All authors are or were employees of Genentech/Roche

sources listed in your Funding Information later in the submission form are also declared in your Financial Disclosure statement.

View published research articles from [PLOS ONE](#) for specific examples.

**NO authors have competing interests**

Enter: *The authors have declared that no competing interests exist.*

**Authors with competing interests**

Enter competing interest details beginning with this statement:

*I have read the journal's policy and the authors of this manuscript have the following competing interests: [insert competing interests here]*

\* typeset

**Ethics Statement**

NA

Enter an ethics statement for this submission. This statement is required if the study involved:

- Human participants
- Human specimens or tissue
- Vertebrate animals or cephalopods
- Vertebrate embryos or tissues
- Field research

Write "N/A" if the submission does not require an ethics statement.

General guidance is provided below. Consult the [submission guidelines](#) for detailed instructions. **Make sure that all information entered here is included in the Methods section of the manuscript.**

**Format for specific study types**

**Human Subject Research (involving human participants and/or tissue)**

- Give the name of the institutional review board or ethics committee that approved the study
- Include the approval number and/or a statement indicating approval of this research
- Indicate the form of consent obtained (written/oral) or the reason that consent was not obtained (e.g. the data were analyzed anonymously)

**Animal Research (involving vertebrate animals, embryos or tissues)**

- Provide the name of the Institutional Animal Care and Use Committee (IACUC) or other relevant ethics board that reviewed the study protocol, and indicate whether they approved this research or granted a formal waiver of ethical approval
- Include an approval number if one was obtained
- If the study involved *non-human primates*, add *additional details* about animal welfare and steps taken to ameliorate suffering
- If anesthesia, euthanasia, or any kind of animal sacrifice is part of the study, include briefly which substances and/or methods were applied

**Field Research**

Include the following details if this study involves the collection of plant, animal, or other materials from a natural setting:

- Field permit number
- Name of the institution or relevant body that granted permission

**Data Availability**

Authors are required to make all data underlying the findings described fully available, without restriction, and from the time of publication. PLOS allows rare exceptions to address legal and ethical concerns. See the [PLOS Data Policy](#) and [FAQ](#) for detailed information.

Yes - all data are fully available without restriction

A Data Availability Statement describing where the data can be found is required at submission. Your answers to this question constitute the Data Availability Statement and **will be published in the article**, if accepted.

**Important:** Stating 'data available on request from the author' is not sufficient. If your data are only available upon request, select 'No' for the first question and explain your exceptional situation in the text box.

Do the authors confirm that all data underlying the findings described in their manuscript are fully available without restriction?

**Describe where the data may be found in full sentences. If you are copying our sample text, replace any instances of XXX with the appropriate details.**

- If the data are **held or will be held in a public repository**, include URLs, accession numbers or DOIs. If this information will only be available after acceptance, indicate this by ticking the box below. For example: *All XXX files are available from the XXX database (accession number(s) XXX, XXX).*
- If the data are all contained **within the manuscript and/or Supporting Information files**, enter the following: *All relevant data are within the manuscript and its Supporting Information files.*
- If neither of these applies but you are able to provide **details of access elsewhere**, with or without limitations, please do so. For example:

*Data cannot be shared publicly because of [XXX]. Data are available from the XXX Institutional Data Access / Ethics Committee (contact via XXX) for researchers who meet the criteria for access to confidential data.*

*The data underlying the results presented in the study are available from (include the name of the third party*

All relevant data are within the manuscript and its Supporting Information files.

*and contact information or URL).*

- This text is appropriate if the data are owned by a third party and authors do not have permission to share the data.

\* typeset

Additional data availability information:

1 **IL23 signaling is not an important driver of liver inflammation and fibrosis in murine non-**  
2 **alcoholic steatohepatitis models**

3

4 **Authors**

5 Jose E. Heredia<sup>1†</sup>, Clare Sorenson<sup>2</sup>, Sean Flanagan<sup>2</sup>, Victor Nunez<sup>2</sup>, Charles Jones<sup>2</sup>, Angela  
6 Martzall<sup>2</sup>, Laurie Leong<sup>2</sup>, Andres Martinez-Paler<sup>1</sup>, Alexis Scherl<sup>2</sup>, Hans D. Brightbill<sup>3</sup>, Nico  
7 Ghilardi<sup>1\*</sup>, Ning Ding<sup>1†</sup>

8

9 **Affiliation**

10 <sup>1</sup> Department of Discovery Immunology, Genentech, South San Francisco, CA, USA

11 <sup>2</sup> Department of Pathology, Genentech, South San Francisco, CA, USA

12 <sup>3</sup> Department of Translational Immunology, Genentech, South San Francisco, CA, USA

13 \* Current address: Dice Therapeutics, South San Francisco, CA, USA.

14 † To whom correspondence should be addressed: heredij1@gene.com or ding.ning@gene.com

15

16 **Abstract**

17 Non-alcoholic fatty liver disease (NAFLD), represents an unmet medical need that can progress  
18 to non-alcoholic steatohepatitis (NASH), which, without intervention, can result in the  
19 development of cirrhosis and hepatocellular carcinoma (HCC). Inflammation is a pathological  
20 hallmark of NASH, and targeting key inflammatory mediators of NASH may lead to potential  
21 therapeutics for the disease. Herein, we aimed to investigate the role of IL-23 signaling in the  
22 disease progression in murine NASH models. We showed that recombinant IL-23 can promote IL-

23 17 producing cell expansion in the liver and that these cells are predominately  $\gamma\delta$  T cells and  
24 Mucosal Associated Invariant T cells (MAITs). Reciprocally, we found that IL23R is necessary for  
25 the expansion of  $\gamma\delta$  T cells and MAIT cells in the western diet (WD) diet induced NASH model.  
26 However, we did not observe any dramatic differences in liver inflammation and fibrosis between  
27 wild type and Il23r<sup>-/-</sup> mice in the same NASH model. Furthermore, we found that Il23r deletion  
28 does not impact liver inflammation and fibrosis in the choline-deficient, L-amino acid-defined and  
29 high-fat diet (CDA-HFD) induced NASH model. Based on these findings, we therefore propose  
30 that IL-23 signaling is not a crucial determinant of NASH pathogenesis in preclinical models and  
31 targeting this pathway may not be sufficient to ameliorate the disease progression in NASH  
32 patients.

33

## 34 Introduction

35 Non-alcoholic fatty liver disease (NAFLD) is defined as a chronic liver disease that imparts excess  
36 lipid accumulation in the liver in the absence of secondary causes such as viral infections or  
37 alcohol abuse[1, 2]. NAFLD can progress from simple hepatic steatosis to non-alcoholic  
38 steatohepatitis (NASH) characterized by inflammation and fibrosis, which is a significant risk  
39 factor for cirrhosis and hepatocellular carcinoma (HCC) [3-6]. Within the past decades, the  
40 epidemic of obesity has led to the sharp rise of NAFLD/NASH occurrence [2, 7]. However, there  
41 are no FDA-approved therapies for NASH driven chronic liver disease, which may be largely due  
42 to our limited understanding of molecular underpinnings of liver inflammation and fibrosis.

43



44 IL-23 is a cytokine that has been implicated in IL-17 driven pathologies such psoriasis, colitis, and  
45 autoimmune diseases [8-11]. As an IL-12 cytokine family member, IL-23 is composed of a  
46 heterodimer of IL-12p40 subunit and IL-23p19 subunit (IL-23p19/p40) which signals through the  
47 IL-23R and IL-12R $\beta$ 1 dimeric receptor [12]. Mice that lack IL-23p19 demonstrate an inability to  
48 drive the expansion of pathogenic IL-17 producing cells [13-15]. All IL-17 expressing cells also  
49 express RAR-related orphan receptor gamma t (ROR $\gamma$ t), the master transcription factor driving  
50 the TH17 signature [16, 17]. In this regard, previous studies have implicated that IL-17 producing  
51 cells promote hepatic inflammation and fibrosis[18]. It has also been reported that there is  
52 accumulation of IL-17 producing cells in the livers from NASH patients or diet induced NASH  
53 preclinical murine models [19-22]. Additionally, IL-17 has been shown to be elevated by liver  
54 damaging agents such as Carbon Tetra-Chloride and Concanavalin A in models of acute hepatitis  
55 [18, 20-23]. While these studies suggest that IL-17 producing cells may contribute to chronic liver  
56 disease, the role of IL-23 signaling in NASH has not been fully dissected.

57  
58 In this study, we hypothesized that IL-23 signaling may play an important role in the NASH  
59 pathogenesis. We showed that systemic administration of recombinant IL-23 protein induces IL-  
60 17 producing cell expansion in the liver and that these cells are predominately  $\gamma\delta$  T cells and  
61 Mucosal Associated Invariant T cells (MAITs). Reciprocally, genetic ablation of Il23r attenuated  
62  $\gamma\delta$  T and MAIT cell expansion in western diet (WD)-induced NASH model. However, we did not  
63 observe that Il23r deletion exhibits dramatic effects on liver inflammation, fibrosis and liver  
64 function in the same model. Similarly, we found that Il23r $^{-/-}$  mice are not protected from liver  
65 inflammation and fibrosis in another model, the choline-deficient, L-amino acid-defined and

66 high-fat diet (CDA-HFD) induced NASH model. Thus, these results do not support a causal role of  
67 IL-23 signaling in the NASH pathogenesis and suggest that targeting IL-23 signaling may not be a  
68 viable therapeutic strategy to treat NASH patients.

69

## 70 **Results**

### 71 **Recombinant IL-23 increases ROR $\gamma$ t cell accumulation in liver**

72 In order to determine whether IL-23 is sufficient to induce hepatic expansion of ROR $\gamma$ t positive  
73 IL-17 producing cells, we intraperitoneally injected 0.5ug recombinant mouse IL-23 (rmIL-23)  
74 daily for three consecutive days into mice fed on normal diet (ND) and analyzed the livers 24hrs  
75 after the last injection. Administration of rmIL-23 led to a five-fold expansion of hepatic Ki67<sup>+</sup>  
76 ROR $\gamma$ t cells (Figures 1A and 1B) and a two-fold increase in the percentage of Ki67<sup>+</sup> ROR $\gamma$ t cells  
77 when compared to vehicle control (Figure 1C). ROR $\gamma$ t cells that proliferated actively were  
78 identified as MAIT and  $\gamma\delta$  T Cells (Figures 1D and 1E). rmIL-23 treatment also induced an increase  
79 in the percentage of hepatic neutrophils and inflammatory monocytes when compared to vehicle  
80 control (Figures 1F and 1G). These results thus suggest that IL-23 is sufficient to induce ROR $\gamma$ t cell  
81 accumulation and pro-inflammatory response within the livers.

82

### 83 **Western Diet induced hepatic expansion of ROR $\gamma$ t cells is dependent on IL-23R**

84 Next, we investigated whether IL-23 signaling is required for  of ROR $\gamma$ t cell accumulation in the  
85 animal model of NASH. Western Diet (WD) consisting of high fat, high fructose, and added  
86 cholesterol have been established to induce several NASH phenotypes including hepatic  
87 inflammation, fibrosis and an increase in  liver damage, measured by the serum biomarkers such

88 as alanine aminotransferase (ALT), aspartate aminotransferase (AST), all in a nutritional setting  
89 without liver damaging chemicals [24, 25]. We fed WT and Il23r<sup>-/-</sup> mice with normal diet (ND) or  
90 WD for 20 weeks (Figure 2A) [26]. The WD induced the expansion of ROR $\gamma$ t<sup>+</sup>  $\gamma$  $\delta$  T cells and MAIT  
91 cells in livers from WT mice (Figure 2B and 2C). In Il23r<sup>-/-</sup> mice, we found that WD-induced  
92 expansion of  $\gamma$  $\delta$  T cells and MAIT cells were dramatically normalized to the baseline.  
93 Furthermore, by intracellular staining of liver  $\gamma$  $\delta$  T cells, we observed a significant decrease of IL-  
94 17A production from Il23r<sup>-/-</sup> compared to WT. These data suggest that IL-23 plays an important  
95 role in regulating IL17 producing cells in WD induced NASH model.

96

#### 97 **IL-23 signaling is not critical for hepatic inflammation and fibrosis induced by WD in mice**

98 Having established its critical role in WD-induced ROR $\gamma$ t cell accumulation, we explored the  
99 contribution of IL-23 signaling to WD-induced liver inflammation and fibrosis. While there is a  
100 clear increase of hepatic inflammation induced by WD, we did not observe any noticeable  
101 differences in liver inflammation between WT and Il23r<sup>-/-</sup> livers from WD fed mice as assessed  
102 by histology and pro-inflammatory gene expression (Figures 3A and 3B). On the other hand, while  
103 we observed a modest, but statistically significant, reduction of pro-inflammatory monocytes in  
104 the WD induced Il23r<sup>-/-</sup> liver (Figure 3C), there was no significant difference of neutrophil  
105 infiltration to the liver between Il23r<sup>-/-</sup> and WT mice (Figure 3D), the main myeloid cell known to  
106 be recruited by IL-17 induced chemokines. In addition, we found that the serum levels of  
107 Keratinocytes-derived chemokine (KC) (Figure 3E) and Interferon gamma-induced protein 10 (IP-  
108 10) (Figure 3F) were not changed in Il23r<sup>-/-</sup> mice. Next, to address the role of IL23R signaling in  
109 liver fibrosis in the WD-induced NASH model, we evaluated hepatic collagen content by

110 trichrome staining analysis and hepatic collagen gene expression. We did not observe a  
111 significant difference of collagen content at the histology level as well as at the transcriptional  
112 level (Figures 4A and 4B). Overall, these results do not suggest IL-23 signaling as the main driver  
113 of liver inflammation and fibrosis in the WD-induced NASH model.

114

#### 115 **IL-23 signaling does not contribute to WD induced liver dysfunction**

116 Next, we examined the impact of Il23r deletion on liver function. In this regard, we measured  
117 several serum biomarkers of liver function. The results showed that there is little difference of  
118 serum ALT/AST, alkaline phosphatase (AP), albumin, cholesterol, and triglyceride levels between  
119 WT and Il23r<sup>-/-</sup> mice fed on WD (Figure 5C-5H). Similarly, IL-23R deficiency appears not to affect  
120 the WD-induced whole-body weight as well as liver weight gains (Figure 5A and 5B). Collectively,  
121 these data suggests that IL-23 signaling may not contribute to liver dysfunction caused by WD-  
122 induced metabolic imbalance.

123

#### 124 **IL-23 signaling does not contribute to liver inflammation and fibrosis in the CDA-HFD model of** 125 **NASH**

126 To complement our findings in WD-induced NASH model, we sought to determine whether IL23  
127 signaling contributes to the pathogenesis of NASH in another animal model. In this regard, we  
128 chose the CDA-HFD model (Figure 6A) because this model has been demonstrated to recapitulate  
129 steatosis, inflammation, and advanced fibrosis in liver [27]. The CDA-HFD significantly induced  
130 the expansion of ROR $\gamma$ <sup>+</sup>  $\gamma\delta$  T Cells and MAIT cells in mouse livers (Figures 6B and 6C). Consistent  
131 to our observation in WD-induced NASH model, we found no impact of IL-23R depletion on liver

132 inflammation and fibrosis by histology (Figures 6D). Furthermore, no significant changes in  
133 hepatic inflammatory or fibrotic gene expression were detected between WT and Il23r<sup>-/-</sup> mice  
134 fed on CDA-HFD (Figure 6G). In addition, we did not observe any significant change in body  
135 weight, liver weight, and a variety of serum biomarkers for liver function between WT and Il23r-  
136 /- mice. Taken together, these results suggest that IL-23 signaling does not contribute to hepatic  
137 inflammation and fibrosis in the CDA-HFD NASH model.

138

## 139 Discussion

140 NAFLD/NASH is an unmet medical need that is increasingly common around the world. The  
141 incidence of NAFLD world-wide is approximately 25%, and the global prevalence of NASH patients  
142 from NAFLD biopsied patients was estimated to be 59.1% based on Meta-analysis data [7, 28].

143 There are currently no approved therapies for NAFLD/NASH, and pro-inflammatory pathways  
144 have been proposed to be a class of appealing targets for this complex disease [29]. In this regard,  
145 it came to our attention that hepatic IL-17 producing cells have been shown to promote liver  
146 inflammation and dysfunction [18-21]. However, genetic dissection of this pathway, particularly  
147 its upstream regulator IL-23, in the preclinical NASH models is lacking and the target candidacy  
148 of this IL-17/IL-23 axis in NASH is yet to be fully established.

149

150 In this context, we therefore chose to investigate the contribution of IL-23 signaling to NASH  
151 pathogenesis by testing IL-23R deficient mice in animal models of NASH. Our data showed that,  
152 while recombinant IL-23 is sufficient to drive IL-17A producing cell expansion and pro-  
153 inflammatory myeloid cell infiltration in liver, Il-23r<sup>-/-</sup> mice are not protected from liver

154 inflammation and fibrosis in two NASH models, suggesting the contribution of IL-23 signaling to  
155 NASH pathogenesis is minimal. These observations thus challenge the assumption that IL-17  
156 producing cells that have been shown to be present in NASH patient liver samples may play a  
157 causal role in the disease pathogenesis[30]. It should also be noted that we cannot rule out IL-  
158 23's contribution to non-NASH liver fibrosis as some reports suggest IL-23 signaling plays a role  
159 in cholestatic or viral driven liver fibrosis [18, 31]. Nevertheless, the dispensability of IL-23  
160 signaling in NASH driven liver inflammation is intriguing given its critical role in a wide variety of  
161 pro-inflammatory diseases. Since it is well documented that many inflammatory factors such as  
162 cytokines and PAMPs are elevated in NASH models, it is not inconceivable that the accumulation  
163 of these factors may mask any effects of IL-23 in the NASH models [29, 32]. Further studies are  
164 warranted to dissect the potential crosstalk between IL-23 and other proinflammatory cytokines  
165 during the pathogenesis of NASH.

166

167 In summary, we present the evidence that IL-23r<sup>-/-</sup> mice are not protected from liver  
168 inflammation and fibrosis in two NASH preclinical models, thus suggesting that IL-23 signaling  
169 may not be an effective therapeutic target for NASH. Our study also supports the necessity of  
170 leveraging genetic models to validate drug targets when possible and the notion that the overall  
171 role of IL-23/IL-17 axis in NASH may need to be re-evaluated.

172

## 173 **Material and Methods**

### 174 **Mouse studies**

175 Il23r<sup>-/-</sup> mice were generated as described previously [33], the control group were littermate wild  
176 type mice. Diets used in this study were purchased from Research Diets; Normal Diet (ND) was  
177 compared either to Western Diet (WD) (Diet #D19021501) composed of 40% kcal Fat, 22% kcal  
178 Fructose, and 1.25% Cholesterol or Choline Deficient L-Amino Acid Derived High Fat Diet (CDA-  
179 HFD) (Diet #A06071302) composed of 60% kcal Fat, 0.1% Methionine, and no added choline. All  
180 mice started the diets at 8 weeks of age, and all mice used were males. The ND vs WD cohort  
181 were challenged with the diet for 20 weeks. The ND vs CDA-HFD cohorts were on the diets for 9  
182 weeks. C57Blk/6 mice from Jackson Laboratory were used for the Intraperitoneal (IP) injects of  
183 PBS vs IL-23. Recombinant murine IL-23 was purchase from R&D, mice were IP with either PBS or  
184 0.5ug IL-23 for three consecutive days and livers were harvested 24hrs after last injection. All  
185 animal activity were performed as required by the Institutional Animal Care and Use Committee  
186 (IACUC) of Genentech Inc., Animal Welfare Act, and in Accordance with the Guide for the care  
187 and use of laboratory animals (The Guide).

188

### 189 **Liver digestion and flow cytometry**

190 Upon CO<sub>2</sub> euthanasia, serum was collected, and livers were perfused with 1X PBS, via the portal  
191 vein. Livers were collected for either histology, snap frozen, or tissue processing for non-  
192 parenchymal cell (NPC) isolation. All liver samples per cohort were processed at the same time  
193 by transferring the livers in c-tubes (Miltenyi) and adding 5mL of digestion media consisting of  
194 0.2% Collagenase Type 2 (Worthington), 0.1% DNase I (Roche), 1% BSA (Sigma), in RPMI. Samples  
195 were digested using MACS Miltenyi Dissociator using liver dissociation settings, and incubating  
196 samples at 37degrees C for 30mins in shaker at 120rpm. After digestion incubation, samples were

197 centrifuged at 1600rpm for 5mins, ACK treated pellets were resuspended in 1X PBS and passed  
198 through a 70um cell strainer. Samples were pelleted, and resuspend in 15% Percoll, centrifuged  
199 for 1600rpm for 15mins without brake. These pellets were the non-parenchymal cell (NPC)  
200 fraction, free of hepatocytes. The NPCs were then resuspended in 1X PBS, stained with  
201 LIVE/DEAD fixable dye (Invitrogen) at a 1:1000 dilution, incubated on ice for 15mins, washed,  
202 resuspended in FACS buffer (PBS + 2.5mM EDTA + 5% BSA) with FcR block (Miltenyi), and stained  
203 with the appropriate conjugated fluoro-antibodies. For RORgt staining, cells were  
204 processed/stained using the FOXP3 Transcription Factor staining kit (BD). For intracellular  
205 staining of IL-17a, NPCs were stimulated with Leukocyte Activation Cocktail with GolgiPlug (BD)  
206 for 4hours in RPMI media, then cells were washed, FcR blocked, and stained with appropriate  
207 antibodies. Samples were run and analyzed on Symphony analyzer (BD).

208

#### 209 **RNA Extraction and Quantitative PCR**

210 RNA was isolated from approximately 100mg of liver tissue using 1mL Trizol using the bead  
211 homogenizer Qiagen method, followed by addition of 200uL chloroform, resuspended samples  
212 were centrifuged for 10mins at 13krpm, 300uL clear top aqueous layer was transferred to new  
213 tube followed by the addition of 300uL 70% Ethanol. The 600uL samples were then loaded on a  
214 RNeasy Mini purification column (Qiagen) for RNA isolation. RNA quantification and purity was  
215 analyzed with NanoDrop 2000 (Thermo Scientific). 1ug of RNA was used for cDNA synthesis using  
216 Iscript First Strand cDNA kit (BioRad). cDNA templates were combined with Taqman probes  
217 (Thermo), and Taqman Universal PCR Master Mix (Thermo), and run on QuantaStudio 6 Flex  
218 (Applied Biosystems).



219

## 220 **Histology**

221 Paraffin embedded liver tissues were sectioned and stained for Hematoxylin and Eosin staining  
222 and for Trichrome staining. Automated image analysis was conducted on trichrome stained slides  
223 to access fibrosis and inflammation. Features counted towards inflammation include  
224 inflammatory cells (lobular inflammation), primarily macrophages with some neutrophils, and  
225 areas of hepatocyte injury/ductular reaction. The trichrome stain allowed for robust  
226 identification of both fibrosis and inflammatory features.

227

## 228 **Serum Biomarker and Cytokine Analysis**

229 The liver chemistry panel consists of the following assays: Alanine Transaminase (ALT), Aspartate  
230 Transaminase (AST), Alkaline Phosphatase (AP), Albumin (ALB), and Triglycerides (TRIG). All  
231 assays were performed on the Beckman Coulter Au480 chemistry analyzer using the analytical  
232 principle of spectrophotometry and potentiometry. (Beckman Coulter Inc., Brea CA). Serum  
233 cytokines were measured using Luminex bead assay (Millipore platform).

234

## 235 **Quantification and Statistical Analysis**

236 GraphPad Prism 6 was used for statistical methods using the unpaired student t-test for panels  
237 in Figure 1 and Figure 2D. All other experiments were performed using one-way ANOVA.  
238 Statistical details provided in the figure legends.

239

## 240 **References**

- 241 1. Powell EE, Wong VW, Rinella M. Non-alcoholic fatty liver disease. *Lancet*.  
242 2021;397(10290):2212-24. Epub 2021/04/25. doi: 10.1016/S0140-6736(20)32511-3. PubMed  
243 PMID: 33894145.
- 244 2. Corey KE, Kaplan LM. Obesity and liver disease: the epidemic of the twenty-first century.  
245 *Clin Liver Dis*. 2014;18(1):1-18. Epub 2013/11/28. doi: 10.1016/j.cld.2013.09.019. PubMed  
246 PMID: 24274861.
- 247 3. Raza S, Rajak S, Anjum B, Sinha RA. Molecular links between non-alcoholic fatty liver  
248 disease and hepatocellular carcinoma. *Hepatoma Res*. 2019;5:42. Epub 2019/12/24. doi:  
249 10.20517/2394-5079.2019.014. PubMed PMID: 31867441; PubMed Central PMCID:  
250 PMCPMC6924993.
- 251 4. Doycheva I, Issa D, Watt KD, Lopez R, Rifai G, Alkhouri N. Nonalcoholic Steatohepatitis is  
252 the Most Rapidly Increasing Indication for Liver Transplantation in Young Adults in the United  
253 States. *J Clin Gastroenterol*. 2018;52(4):339-46. Epub 2017/09/30. doi:  
254 10.1097/MCG.0000000000000925. PubMed PMID: 28961576.
- 255 5. Friedman SL, Neuschwander-Tetri BA, Rinella M, Sanyal AJ. Mechanisms of NAFLD  
256 development and therapeutic strategies. *Nat Med*. 2018;24(7):908-22. Epub 2018/07/04. doi:  
257 10.1038/s41591-018-0104-9. PubMed PMID: 29967350; PubMed Central PMCID:  
258 PMCPMC6553468.
- 259 6. Rinella ME. Nonalcoholic fatty liver disease: a systematic review. *JAMA*.  
260 2015;313(22):2263-73. Epub 2015/06/10. doi: 10.1001/jama.2015.5370. PubMed PMID:  
261 26057287.
- 262 7. Younossi ZM, Koenig AB, Abdelatif D, Fazel Y, Henry L, Wymer M. Global epidemiology  
263 of nonalcoholic fatty liver disease-Meta-analytic assessment of prevalence, incidence, and  
264 outcomes. *Hepatology*. 2016;64(1):73-84. Epub 2015/12/29. doi: 10.1002/hep.28431. PubMed  
265 PMID: 26707365.
- 266 8. McGinley AM, Edwards SC, Raverdeau M, Mills KHG. Th17cells, gammadelta T cells and  
267 their interplay in EAE and multiple sclerosis. *J Autoimmun*. 2018. Epub 2018/02/06. doi:  
268 10.1016/j.jaut.2018.01.001. PubMed PMID: 29395738.
- 269 9. Kullberg MC, Jankovic D, Feng CG, Hue S, Gorelick PL, McKenzie BS, et al. IL-23 plays a  
270 key role in *Helicobacter hepaticus*-induced T cell-dependent colitis. *J Exp Med*.  
271 2006;203(11):2485-94. Epub 2006/10/13. doi: 10.1084/jem.20061082. PubMed PMID:  
272 17030948; PubMed Central PMCID: PMCPMC2118119.
- 273 10. Yen D, Cheung J, Scheerens H, Poulet F, McClanahan T, McKenzie B, et al. IL-23 is  
274 essential for T cell-mediated colitis and promotes inflammation via IL-17 and IL-6. *J Clin Invest*.  
275 2006;116(5):1310-6. Epub 2006/05/04. doi: 10.1172/JCI21404. PubMed PMID: 16670770;  
276 PubMed Central PMCID: PMCPMC1451201.
- 277 11. van der Fits L, Mourits S, Voerman JS, Kant M, Boon L, Laman JD, et al. Imiquimod-  
278 induced psoriasis-like skin inflammation in mice is mediated via the IL-23/IL-17 axis. *J Immunol*.  
279 2009;182(9):5836-45. Epub 2009/04/22. doi: 10.4049/jimmunol.0802999. PubMed PMID:  
280 19380832.
- 281 12. Parham C, Chirica M, Timans J, Vaisberg E, Travis M, Cheung J, et al. A receptor for the  
282 heterodimeric cytokine IL-23 is composed of IL-12Rbeta1 and a novel cytokine receptor subunit,  
283 IL-23R. *J Immunol*. 2002;168(11):5699-708. Epub 2002/05/23. doi:  
284 10.4049/jimmunol.168.11.5699. PubMed PMID: 12023369.

- 285 13. Langrish CL, Chen Y, Blumenschein WM, Mattson J, Basham B, Sedgwick JD, et al. IL-23  
286 drives a pathogenic T cell population that induces autoimmune inflammation. *J Exp Med*.  
287 2005;201(2):233-40. Epub 2005/01/20. doi: 10.1084/jem.20041257. PubMed PMID: 15657292;  
288 PubMed Central PMCID: PMCPMC2212798.
- 289 14. Cua DJ, Sherlock J, Chen Y, Murphy CA, Joyce B, Seymour B, et al. Interleukin-23 rather  
290 than interleukin-12 is the critical cytokine for autoimmune inflammation of the brain. *Nature*.  
291 2003;421(6924):744-8. Epub 2003/03/01. doi: 10.1038/nature01355. PubMed PMID:  
292 12610626.
- 293 15. Murphy CA, Langrish CL, Chen Y, Blumenschein W, McClanahan T, Kastelein RA, et al.  
294 Divergent pro- and antiinflammatory roles for IL-23 and IL-12 in joint autoimmune  
295 inflammation. *J Exp Med*. 2003;198(12):1951-7. Epub 2003/12/10. doi: 10.1084/jem.20030896.  
296 PubMed PMID: 14662908; PubMed Central PMCID: PMCPMC2194162.
- 297 16. Romagnani S, Maggi E, Liotta F, Cosmi L, Annunziato F. Properties and origin of human  
298 Th17 cells. *Mol Immunol*. 2009;47(1):3-7. Epub 2009/02/06. doi:  
299 10.1016/j.molimm.2008.12.019. PubMed PMID: 19193443.
- 300 17. Ivanov, II, McKenzie BS, Zhou L, Tadokoro CE, Lepelley A, Lafaille JJ, et al. The orphan  
301 nuclear receptor ROR $\gamma$  directs the differentiation program of proinflammatory IL-17+ T  
302 helper cells. *Cell*. 2006;126(6):1121-33. Epub 2006/09/23. doi: 10.1016/j.cell.2006.07.035.  
303 PubMed PMID: 16990136.
- 304 18. Meng F, Wang K, Aoyama T, Grivennikov SI, Paik Y, Scholten D, et al. Interleukin-17  
305 signaling in inflammatory, Kupffer cells, and hepatic stellate cells exacerbates liver fibrosis in  
306 mice. *Gastroenterology*. 2012;143(3):765-76 e3. Epub 2012/06/13. doi:  
307 10.1053/j.gastro.2012.05.049. PubMed PMID: 22687286; PubMed Central PMCID:  
308 PMCPMC3635475.
- 309 19. Giles DA, Moreno-Fernandez ME, Divanovic S. IL-17 Axis Driven Inflammation in Non-  
310 Alcoholic Fatty Liver Disease Progression. *Curr Drug Targets*. 2015;16(12):1315-23. Epub  
311 2015/06/02. doi: 10.2174/1389450116666150531153627. PubMed PMID: 26028039; PubMed  
312 Central PMCID: PMCPMC4929857.
- 313 20. Tang Y, Bian Z, Zhao L, Liu Y, Liang S, Wang Q, et al. Interleukin-17 exacerbates hepatic  
314 steatosis and inflammation in non-alcoholic fatty liver disease. *Clin Exp Immunol*.  
315 2011;166(2):281-90. Epub 2011/10/12. doi: 10.1111/j.1365-2249.2011.04471.x. PubMed PMID:  
316 21985374; PubMed Central PMCID: PMCPMC3219903.
- 317 21. Giles DA, Moreno-Fernandez ME, Stankiewicz TE, Cappelletti M, Huppert SS, Iwakura Y,  
318 et al. Regulation of Inflammation by IL-17A and IL-17F Modulates Non-Alcoholic Fatty Liver  
319 Disease Pathogenesis. *PLoS One*. 2016;11(2):e0149783. Epub 2016/02/20. doi:  
320 10.1371/journal.pone.0149783. PubMed PMID: 26895034; PubMed Central PMCID:  
321 PMCPMC4760740.
- 322 22. Harley IT, Stankiewicz TE, Giles DA, Softic S, Flick LM, Cappelletti M, et al. IL-17 signaling  
323 accelerates the progression of nonalcoholic fatty liver disease in mice. *Hepatology*.  
324 2014;59(5):1830-9. Epub 2013/10/12. doi: 10.1002/hep.26746. PubMed PMID: 24115079;  
325 PubMed Central PMCID: PMCPMC3975735.
- 326 23. Yan S, Wang L, Liu N, Wang Y, Chu Y. Critical role of interleukin-17/interleukin-17  
327 receptor axis in mediating Con A-induced hepatitis. *Immunol Cell Biol*. 2012;90(4):421-8. Epub  
328 2011/06/22. doi: 10.1038/icb.2011.59. PubMed PMID: 21691280.

329 24. Boland ML, Oro D, Tolbol KS, Thrane ST, Nielsen JC, Cohen TS, et al. Towards a standard  
330 diet-induced and biopsy-confirmed mouse model of non-alcoholic steatohepatitis: Impact of  
331 dietary fat source. *World J Gastroenterol.* 2019;25(33):4904-20. Epub 2019/09/24. doi:  
332 10.3748/wjg.v25.i33.4904. PubMed PMID: 31543682; PubMed Central PMCID:  
333 PMCPMC6737317.

334 25. Drescher HK, Weiskirchen R, Fulop A, Hopf C, de San Roman EG, Huesgen PF, et al. The  
335 Influence of Different Fat Sources on Steatohepatitis and Fibrosis Development in the Western  
336 Diet Mouse Model of Non-alcoholic Steatohepatitis (NASH). *Front Physiol.* 2019;10:770. Epub  
337 2019/07/12. doi: 10.3389/fphys.2019.00770. PubMed PMID: 31293441; PubMed Central  
338 PMCID: PMCPMC6603084.

339 26. Shih VF, Cox J, Kljavin NM, Dengler HS, Reichelt M, Kumar P, et al. Homeostatic IL-23  
340 receptor signaling limits Th17 response through IL-22-mediated containment of commensal  
341 microbiota. *Proc Natl Acad Sci U S A.* 2014;111(38):13942-7. Epub 2014/09/10. doi:  
342 10.1073/pnas.1323852111. PubMed PMID: 25201978; PubMed Central PMCID:  
343 PMCPMC4183330.

344 27. Matsumoto M, Hada N, Sakamaki Y, Uno A, Shiga T, Tanaka C, et al. An improved mouse  
345 model that rapidly develops fibrosis in non-alcoholic steatohepatitis. *Int J Exp Pathol.*  
346 2013;94(2):93-103. Epub 2013/01/12. doi: 10.1111/iep.12008. PubMed PMID: 23305254;  
347 PubMed Central PMCID: PMCPMC3607137.

348 28. Younossi ZM, Blissett D, Blissett R, Henry L, Stepanova M, Younossi Y, et al. The  
349 economic and clinical burden of nonalcoholic fatty liver disease in the United States and  
350 Europe. *Hepatology.* 2016;64(5):1577-86. Epub 2016/10/22. doi: 10.1002/hep.28785. PubMed  
351 PMID: 27543837.

352 29. Albhaisi S, Nouredin M. Current and Potential Therapies Targeting Inflammation in  
353 NASH. *Front Endocrinol (Lausanne).* 2021;12:767314. Epub 2021/12/21. doi:  
354 10.3389/fendo.2021.767314. PubMed PMID: 34925237; PubMed Central PMCID:  
355 PMCPMC8678040.

356 30. Gomes AL, Teijeiro A, Buren S, Tummala KS, Yilmaz M, Waisman A, et al. Metabolic  
357 Inflammation-Associated IL-17A Causes Non-alcoholic Steatohepatitis and Hepatocellular  
358 Carcinoma. *Cancer Cell.* 2016;30(1):161-75. Epub 2016/07/15. doi: 10.1016/j.ccell.2016.05.020.  
359 PubMed PMID: 27411590.

360 31. Schaalan MF, Mohamed WA, Amin HH. Vitamin D deficiency: correlation to interleukin-  
361 17, interleukin-23 and PIIINP in hepatitis C virus genotype 4. *World J Gastroenterol.*  
362 2012;18(28):3738-44. Epub 2012/08/02. doi: 10.3748/wjg.v18.i28.3738. PubMed PMID:  
363 22851868; PubMed Central PMCID: PMCPMC3406428.

364 32. Luci C, Bourinet M, Leclere PS, Anty R, Gual P. Chronic Inflammation in Non-Alcoholic  
365 Steatohepatitis: Molecular Mechanisms and Therapeutic Strategies. *Front Endocrinol*  
366 (Lausanne). 2020;11:597648. Epub 2021/01/02. doi: 10.3389/fendo.2020.597648. PubMed  
367 PMID: 33384662; PubMed Central PMCID: PMCPMC7771356.

368 33. Ghilardi N, Kljavin N, Chen Q, Lucas S, Gurney AL, De Sauvage FJ. Compromised humoral  
369 and delayed-type hypersensitivity responses in IL-23-deficient mice. *J Immunol.*  
370 2004;172(5):2827-33. Epub 2004/02/24. doi: 10.4049/jimmunol.172.5.2827. PubMed PMID:  
371 14978083.

372

373 **Figure Legends**

374 **Figure 1. rmlIL-23 administration induces ROR $\gamma$ t proliferation in liver**

375 FACS staining was performed of hepatic non-parenchymal cells (NPC) from mice administered  
376 either PBS or IL-23 by Intraperitoneal (IP) injections (A-G): Representative FACS gate, IL-23  
377 induced greater frequency of ROR $\gamma$ t<sup>+</sup>Ki67<sup>+</sup> T Cells gated from CD3e<sup>+</sup>CD4<sup>-</sup>CD8<sup>-</sup> (A). Total  
378 ROR $\gamma$ t<sup>+</sup>Ki67<sup>+</sup> T Cells, indication of proliferative cell, and total ROR $\gamma$ t (CD4-CD3-) T Cells quantified  
379 in the liver (B-C). Percentage quantification of Ki67<sup>+</sup> of ROR $\gamma$ t<sup>+</sup>MAITs and ROR $\gamma$ t<sup>+</sup> $\gamma$  $\delta$  T Cells (D-E).  
380 Percentage of Neutrophils and Ly6c<sup>+</sup> monocytes from CD45<sup>+</sup> Cells (F-G). Groups: Vehicle (PBS):  
381 n=6, IL-23 (3x 0.5ug): n=6. Data represents mean  $\pm$  S.D. \*p < 0.05, \*\*p < 0.001, \*\*\*\*p < 0.0001,  
382 two-tailed t-test.

383

384 **Figure 2. IL-23 is required for WD-induced hepatic IL-17 producing cell expansion**

385 WT or Il23r<sup>-/-</sup> mice were fed a ND or WD for 20 weeks, followed by terminal analyses (A). FACS  
386 quantification of percent ROR $\gamma$ t<sup>+</sup> from  $\gamma$  $\delta$  T Cells and ROR $\gamma$ t<sup>+</sup> from MAIT cells (CD3e<sup>+</sup>TCRb<sup>+</sup>CD4<sup>-</sup>  
387 CD8<sup>-</sup>) (B-C). Percentage of IL-17A positive cells in  $\gamma$  $\delta$  T cells from WD fed WT and Il23r<sup>-/-</sup> liver non-  
388 parenchymal cells (NPCs) stimulated with Leukocyte Activation Cocktail with GolgiPlug (BD) for 4  
389 hours (D). Groups: ND WT n=5, ND Il23r<sup>-/-</sup> n=5, WD WT n=7, WD Il23r<sup>-/-</sup> n=7. Data represents  
390 mean  $\pm$  S.D. \*p < 0.05, \*\*p < 0.005, one-way ANOVA.

391

392 **Figure 3. IL-23 signaling is dispensable for WD-induced hepatic inflammation**

393 Liver sectioned H&E stained images of WT and Il23r<sup>-/-</sup> mice on ND or WD (A). Liver mRNA  
394 expression of *Tnf*, *Cd68*, *Ccl2*, *Cxcl2*, and *Cxcl10* (B). Liver FACS analysis of percent Ly6c<sup>+</sup>

395 Monocytes and Neutrophils between the groups. Luminex results for serum levels of KC (E) and  
396 IP-10 (F) chemokines. Groups: ND WT n=5, ND Il23r-/- n=5, WD WT n=7, WD Il23r-/- n=7. Data  
397 represents mean  $\pm$  S.D. \*p < 0.05, \*\*p < 0.005, \*\*\*\*p < 0.00005, one-way ANOVA. C/D??????

398

399 **Figure 4. IL-23 signaling does not contribute to WD-induced hepatic fibrosis**

400 Trichrome staining images of livers (A). Liver mRNA expression of *Col1a1*, *Col1a2*, and *Col3a1*.  
401 Groups: ND WT n=5, ND Il23r-/- n=5, WD WT n=7, WD Il23r-/- n=7.

402

403 **Figure 5. IL-23 signaling does not contribute to WD-induced liver dysfunction**

404 Body weights in gram(g) (A) and percent liver weights from body weight (B). Quantification of  
405 serum liver enzymes for Alanine Aminotransferase (ALT) (C), Aspartate Aminotransferase (AST)  
406 (D), and Alkaline Phosphatase (AP) (E) measured. Serum Albumin protein (F), serum cholesterol  
407 (G) and serum triglycerides (H) quantified. Groups: ND WT n=5, ND Il23r-/- n=5, WD WT n=7, WD  
408 Il23r-/- n=7. Data represents mean  $\pm$  S.D, one-way ANOVA.

409

410 **Figure 6. IL-23 signaling does not contribute to liver inflammation and fibrosis in the CDA-HFD**

411 **NASH model.**

412 WT and Il23r-/- mice were fed CDA-HFD for 9 weeks, followed by liver analysis (A). Percent  
413 quantification of hepatic ROR $\gamma$ t in  $\gamma\delta$  T Cells (B) and MAITs (C). Trichrome staining images and  
414 quantification of Inflammation (E) and Trichrome Collagen content (F). Liver mRNA expression of  
415 *Tnf*, *Cd68*, *Ccl2*, *Cxcl2*, *Col1a1*, *Col1a2*, and *Col3a1* (G). Groups: ND WT n=3, ND Il23r-/- n=3, CDA-  
416 HFD WT n=6, CDA-HFD Il23r-/- n=6. Data represents mean  $\pm$  S.D. \*\*\*p < 0.0005, one-way ANOVA.

417

418 **Figure 7. IL-23 signaling does not contribute to CDA-HFD-induced liver dysfunction.**

419 Body weights in gram (g) (A) and percent liver weights from body weight (B). Quantification of  
420 serum liver enzymes for Alanine Aminotransferase (ALT) (C), Aspartate Aminotransferase (AST)  
421 (D), and Alkaline Phosphatase (AP) (E) measured. Serum Albumin protein (F), serum cholesterol  
422 (G) and serum triglycerides (H) quantified. Groups: ND WT n=3, ND Il23r<sup>-/-</sup> n=3, CDA-HFD WT  
423 n=6, CDA-HFD Il23r<sup>-/-</sup> n=6. Data represents mean  $\pm$  S.D.

424

Figure 1

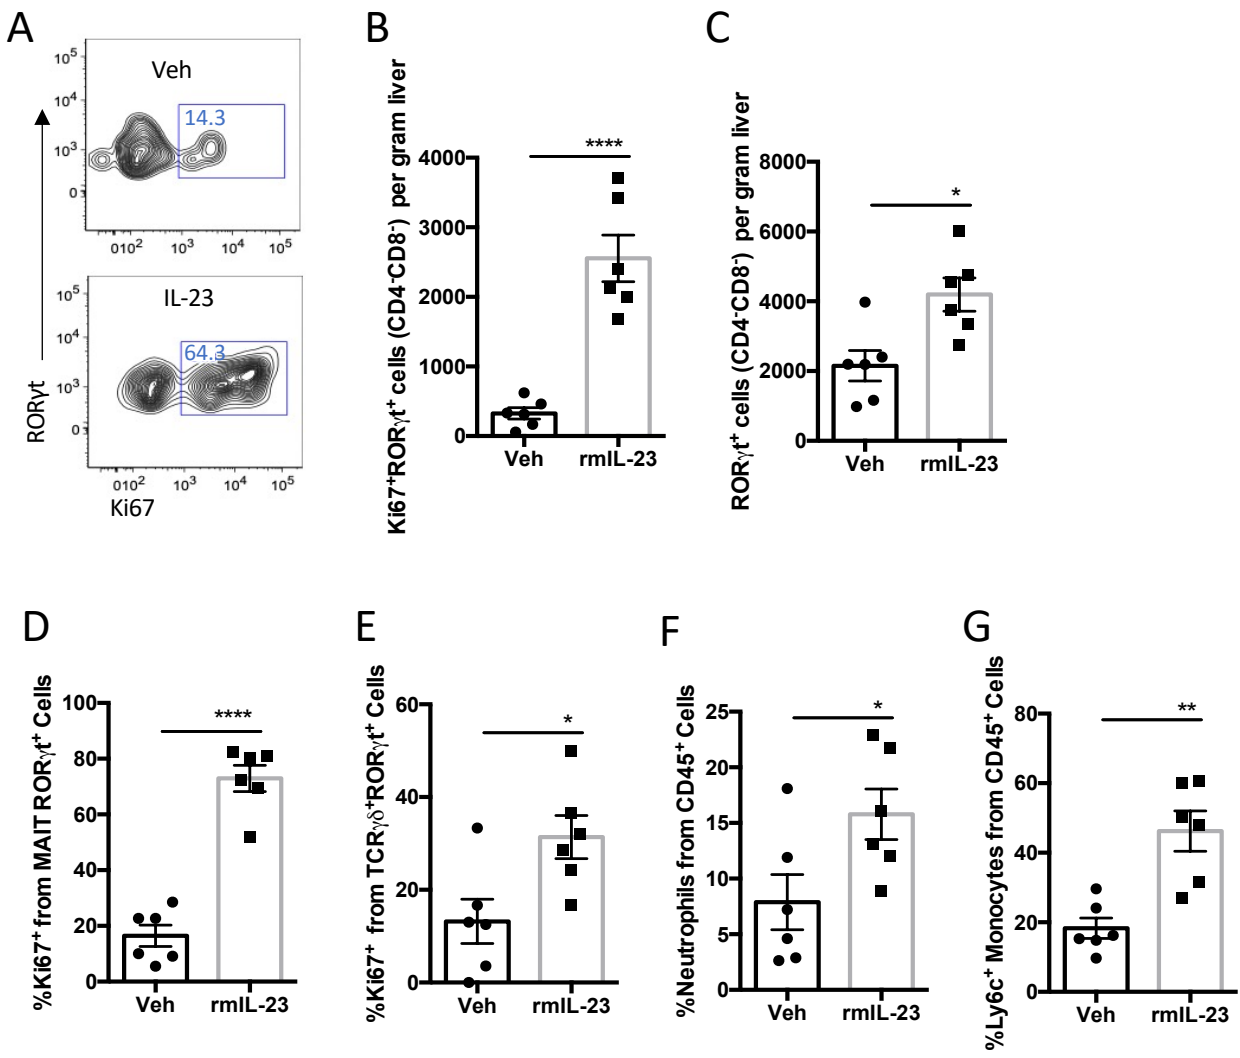



Figure 2

A

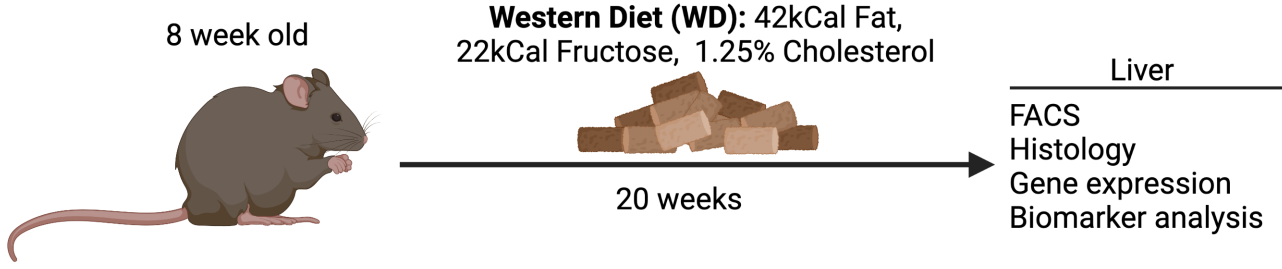

B

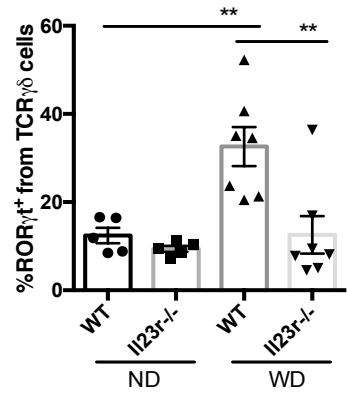

C

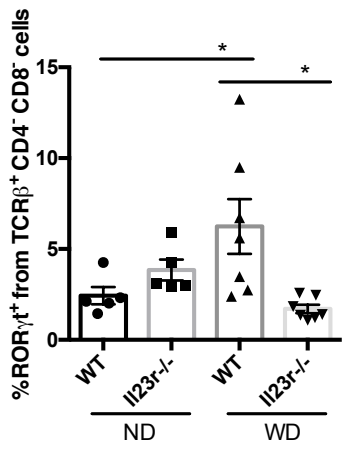

D

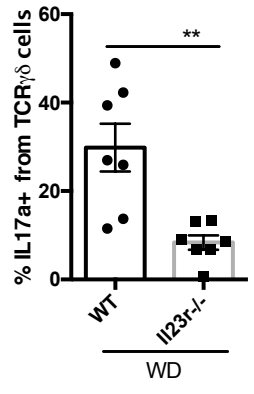

Figure 3

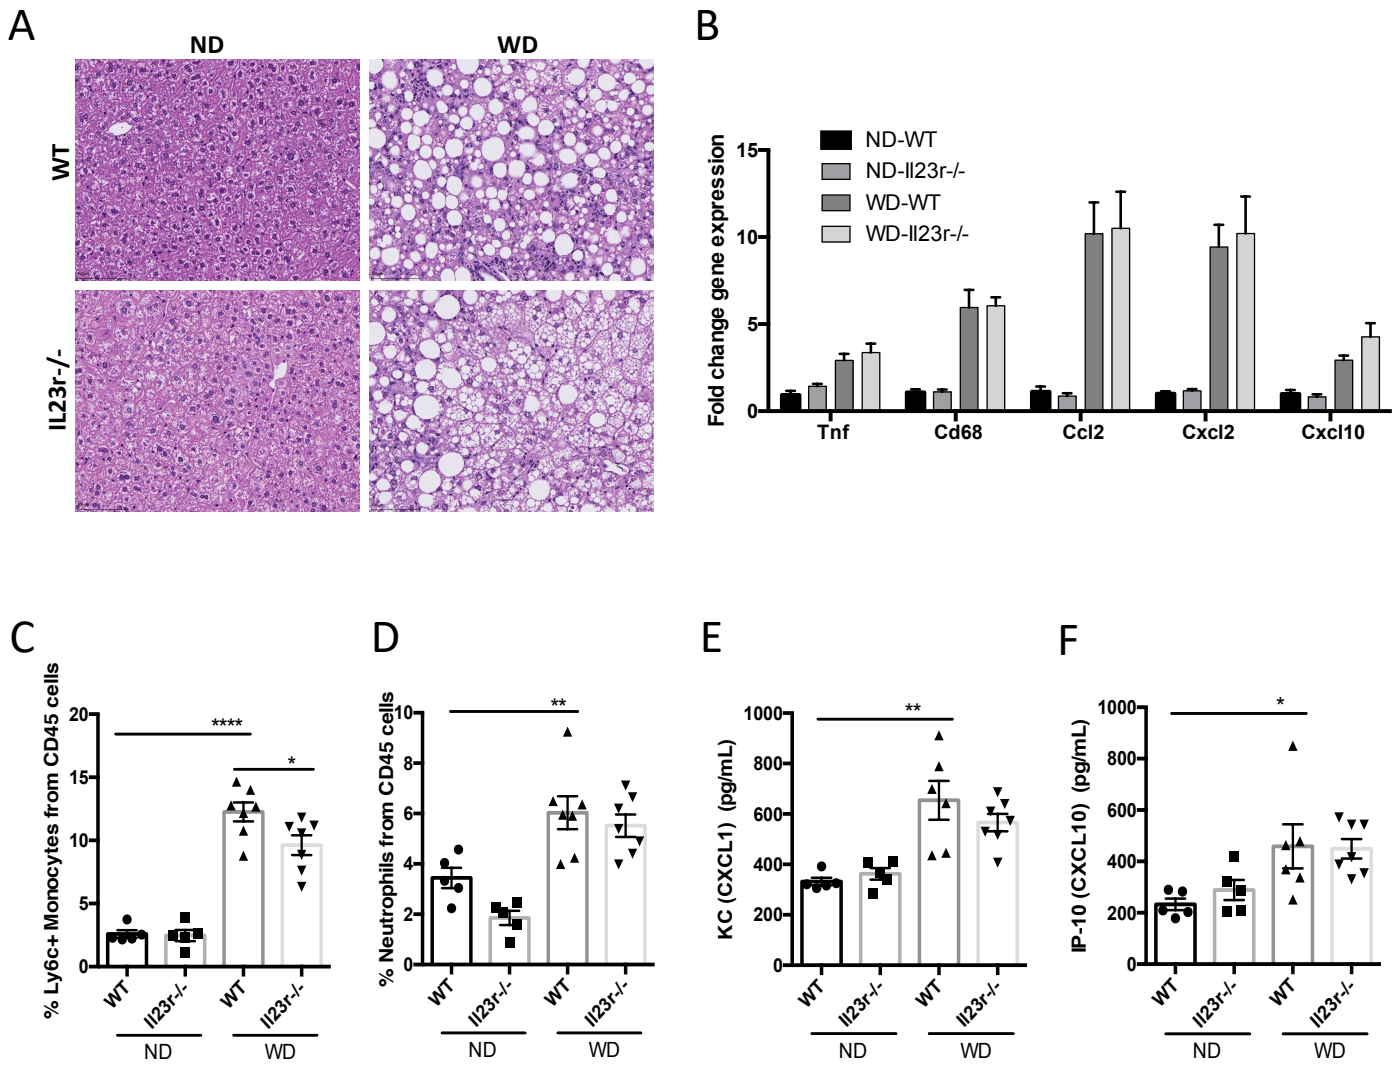

Figure 4

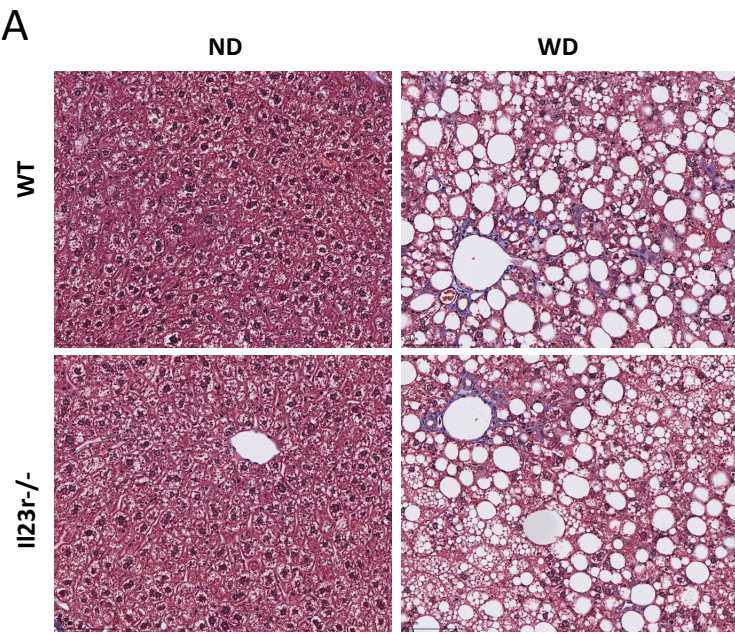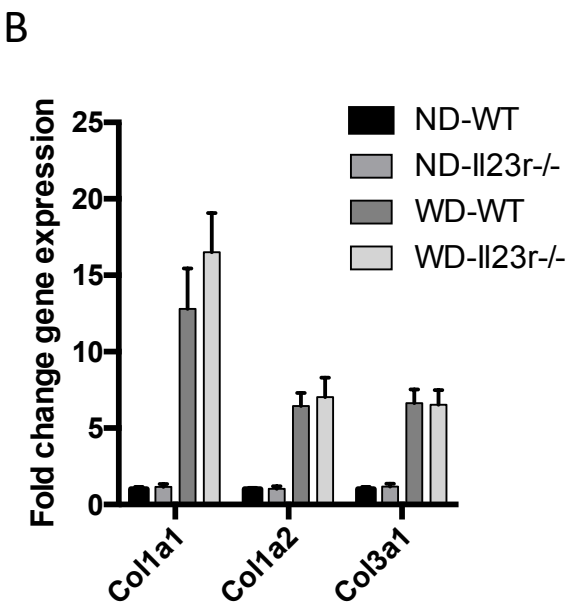

Figure 5

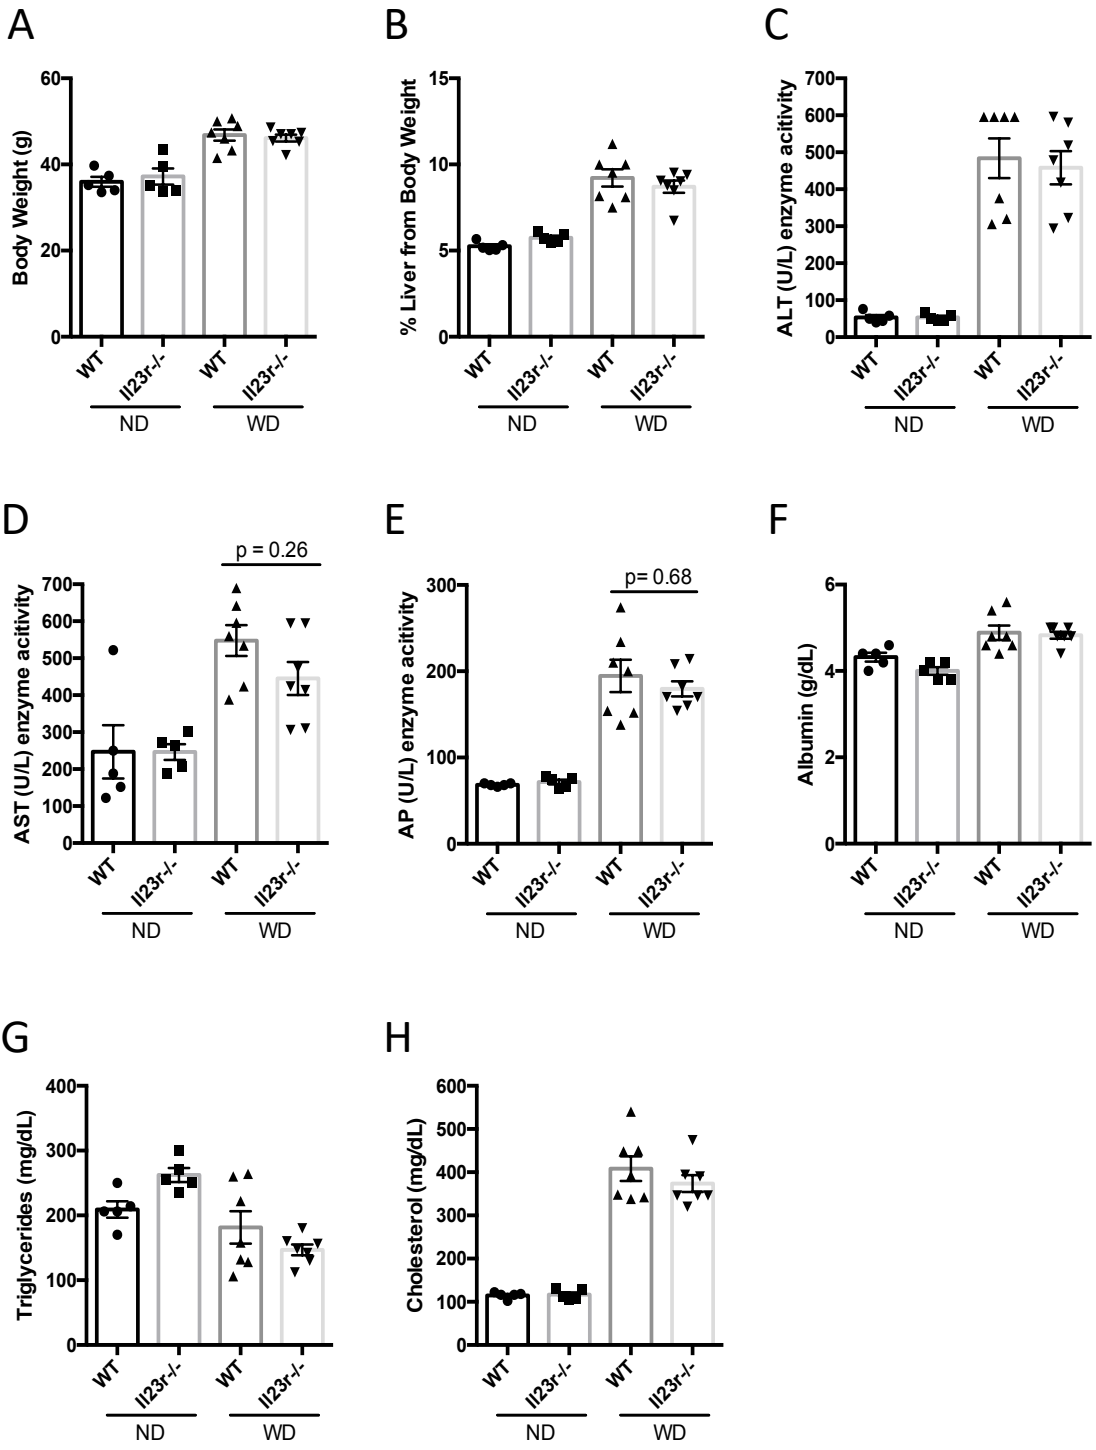

Figure 6

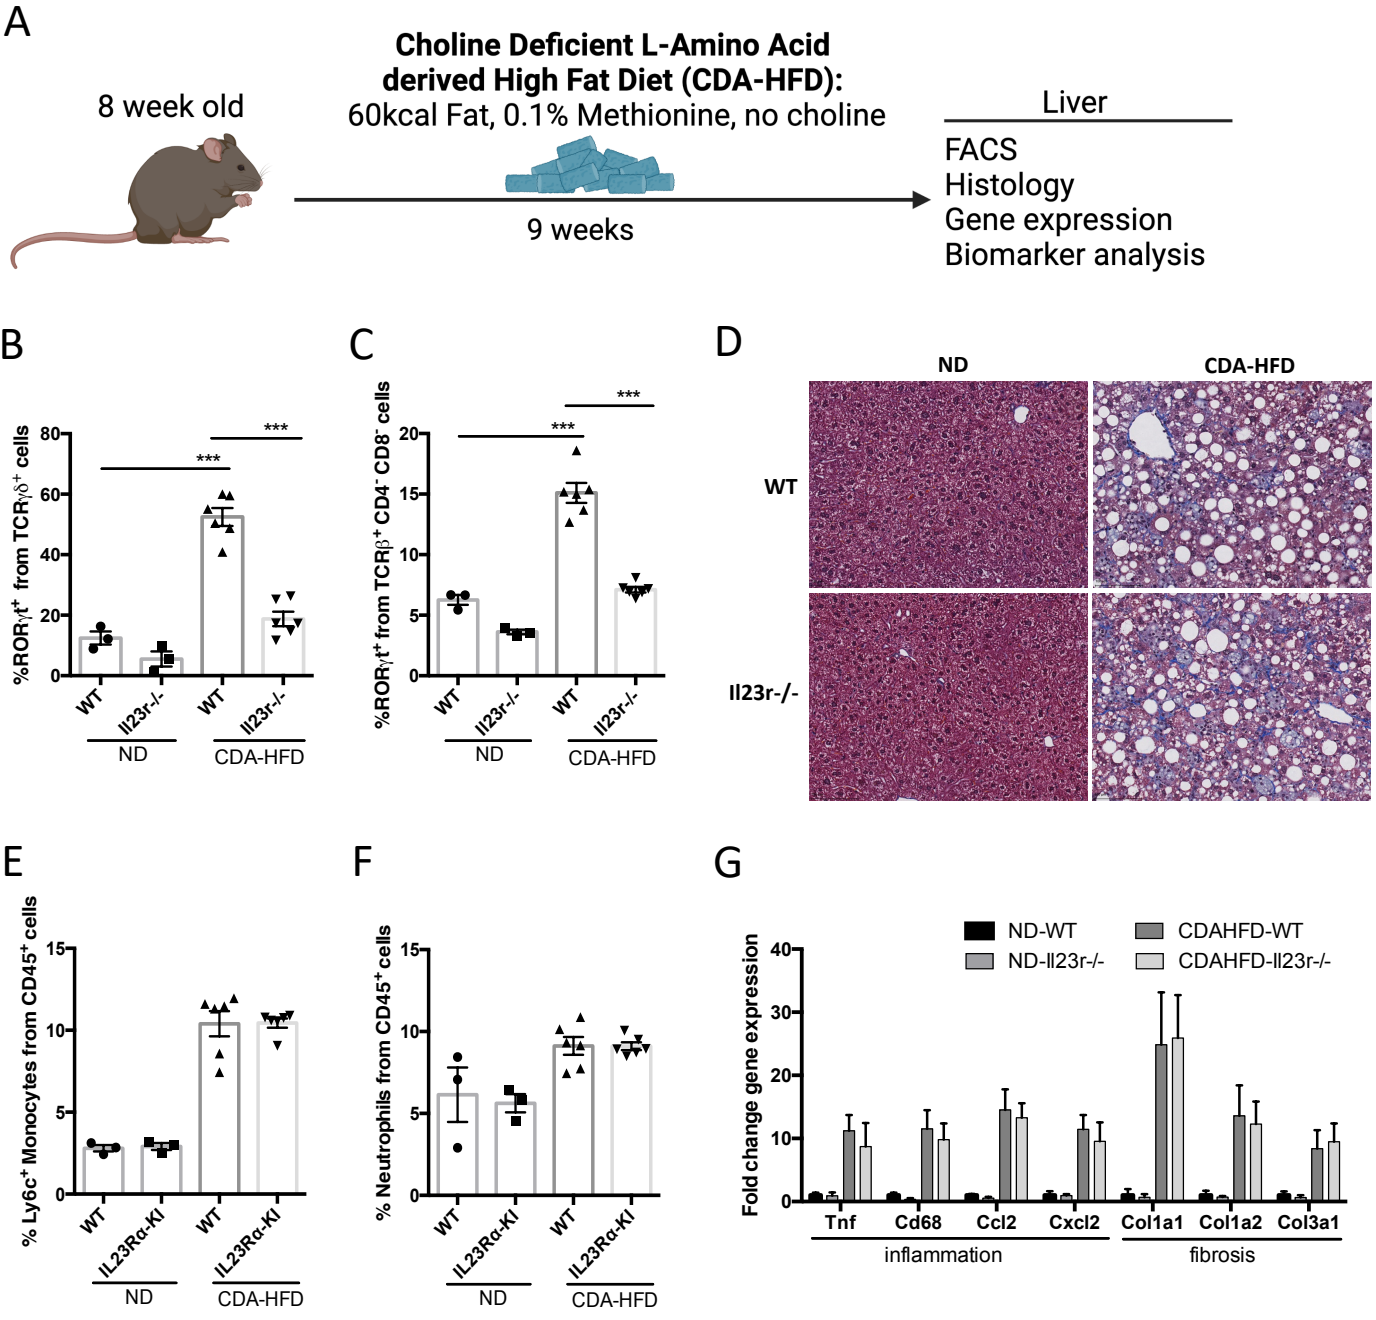

Figure 7

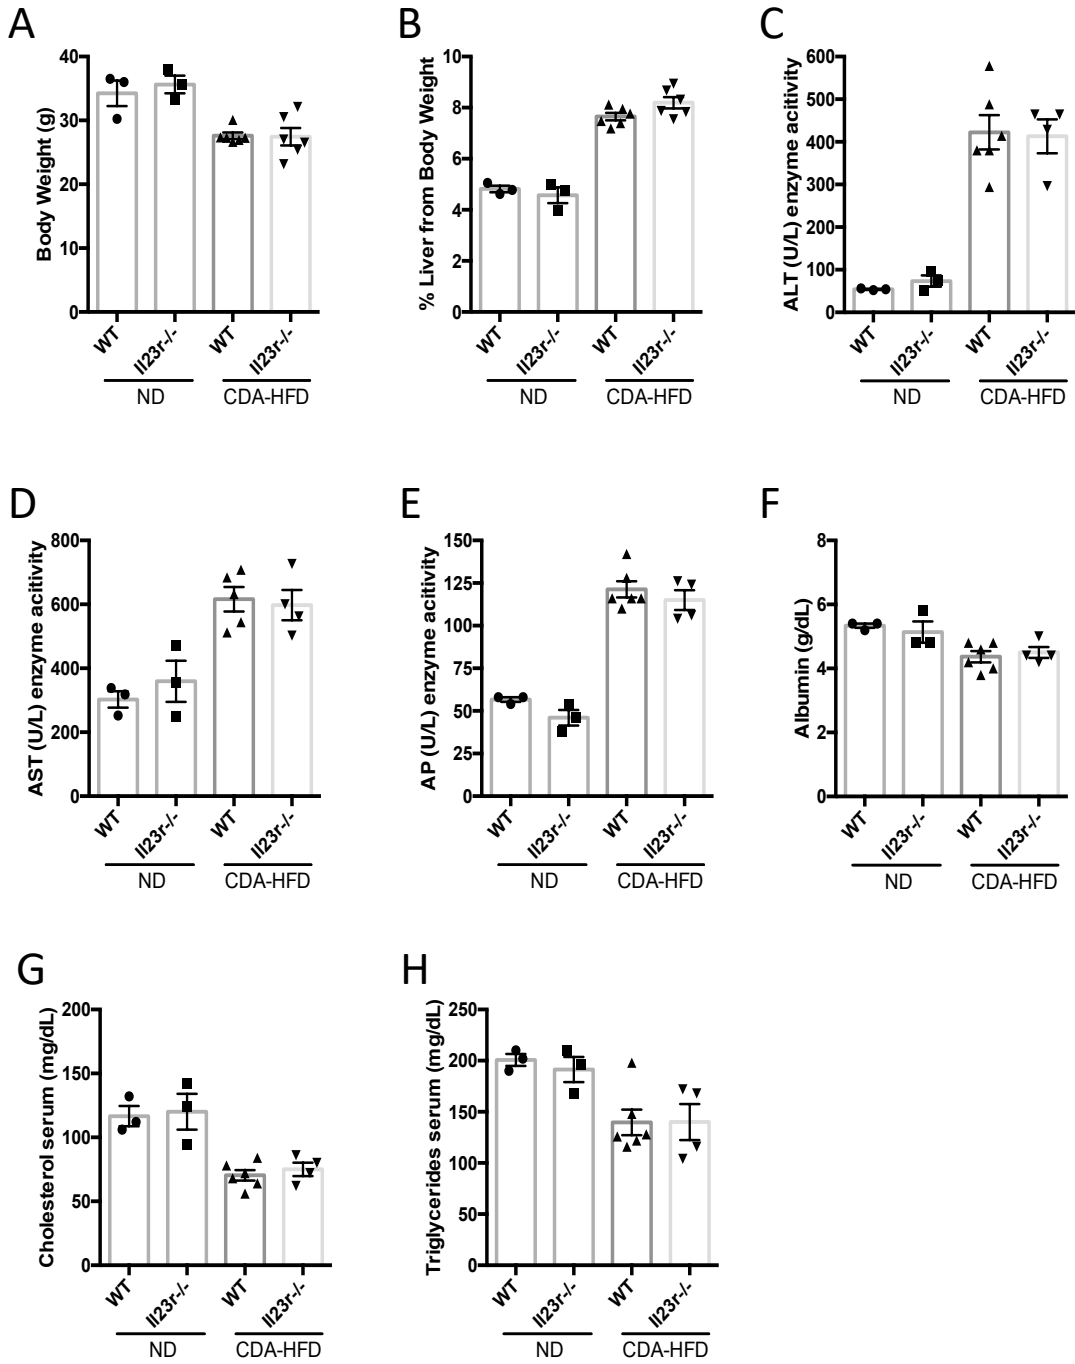

Supplement: pone.0274582.s002.pdf [file pone.0274582.s002.pdf]
